# Supplementary material for: An aptamer-functionalized gold nanoparticle biosensor for the detection of prion protein
Source: Royal Society of Chemistry journal article supplement (doi:10.1039/c3ay42207k), 2014-01-01
Supplement: c3ay42207k1.pdf [file c3ay42207k1.pdf]

## <Electronic Supplementary Information >

### An aptamer-functionalized gold nanoparticle biosensor for the detection of prion protein

*Haijie Zhang<sup>a,b</sup>, Yihui Lu<sup>a</sup>, Yijuan Long<sup>a</sup>, Qinlong Wang<sup>a</sup>, Xiaoxiao Huang<sup>a</sup>, Rui Zhu<sup>a</sup>,*

*Xiliang Wang<sup>a</sup>, Liping Liang<sup>a</sup>, Ping Teng<sup>a</sup>, Huzhi Zheng<sup>a,\*</sup>*

*<sup>a</sup> College of Chemistry and Chemical Engineering, Southwest University, Chongqing  
400715, P. R. China*

*<sup>b</sup> Environmental Monitoring Station of Dazhou, Dazhou, Sichuan, 635000, P. R.  
China*

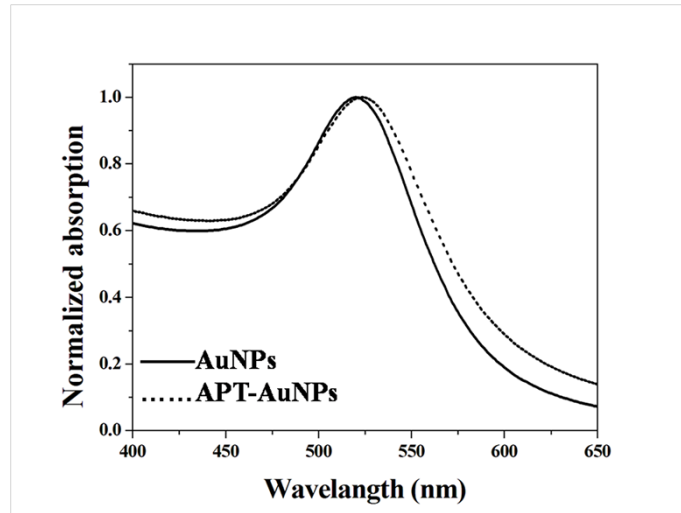

**Fig. S1.** Normalized UV-Vis spectra of AuNPs (Solid line) and APT-AuNPs (Dash line).

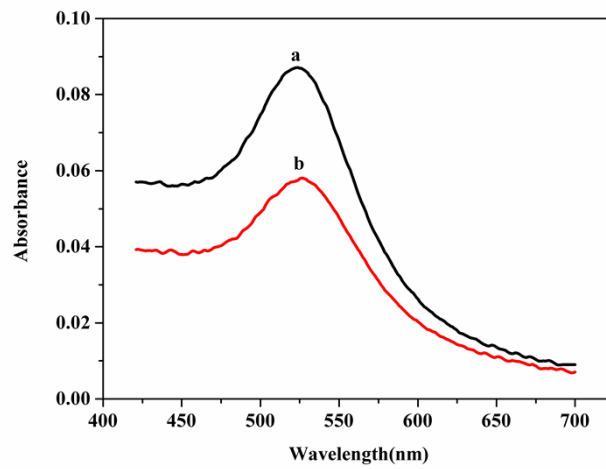

**Fig. S2.** UV-vis absorbance spectra of APT-AuNPs in the absence (a) and presence of 20 nmol/L rPrP (b). APT-AuNPs concentration: 1.0 nmol/L, pH 6.0 PBS, and 0.2 mol/L NaCl.

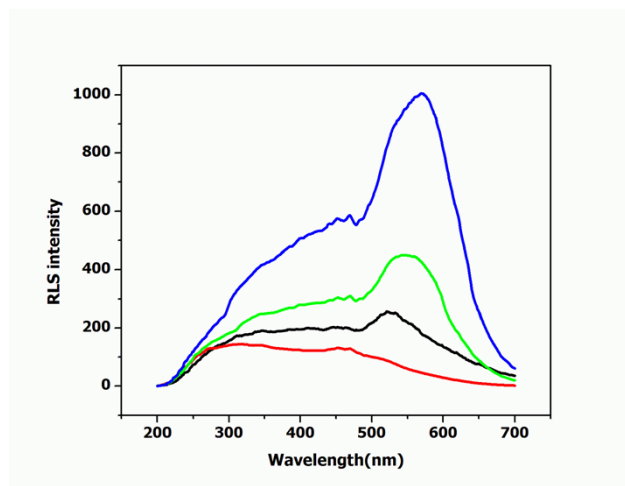

**Fig. S3.** RLS spectra of AuNPs (black line) and APT-AuNPs in the absence (red line) and presence of 20 nmol/L rPrP (green line) and 50 nmol/L rPrP (blue line).

The concentration of APT-AuNPs and NaCl is 1.0 nmol/L and 0.2 mol/L, respectively.

The concentration of AuNPs is 1.0 nmol/L. The pH value is 6.0.

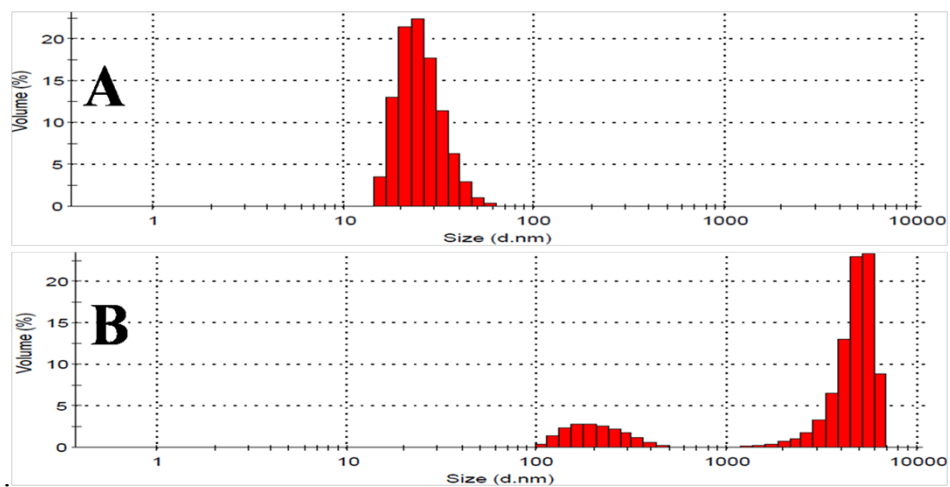

**Fig. S4.** Hydrodynamic diameter of APT-AuNPs in the absence (A) and presence (B) of 20 nmol/L rPrP in pH 6.0 PBS. APT-AuNPs: 1.0 nmol/L, NaCl: 0.2 mol/L.

**Table S1.** Effect of coexisting substances on the determination of rPrP (20 nmol/L) using the APT-AuNPs (1.0 nmol/L) system containing 0.2 mol/L NaCl.

| Coexisting substance                  | Concentration ( $\mu\text{mol/L}$ ) | Relative error (%) |
|---------------------------------------|-------------------------------------|--------------------|
| $\text{Cd}^{2+}$ , $\text{Cl}^-$      | 10                                  | 4.0                |
| $\text{Cu}^{2+}$ , $\text{NO}_3^-$    | 10                                  | 5.3                |
| $\text{Al}^{3+}$ , $\text{SO}_4^{2-}$ | 10                                  | 4.8                |
| $\text{Ni}^{2+}$ , $\text{SO}_4^{2-}$ | 10                                  | 0.34               |
| $\text{Hg}^{2+}$ , $\text{Cl}^-$      | 4                                   | -4.7               |
| $\text{Pb}^{2+}$ , $\text{NO}_3^-$    | 4                                   | 0.86               |
| $\text{Fe}^{2+}$ , $\text{Cl}^-$      | 4                                   | -1.6               |
| $\text{Ag}^+$ , $\text{NO}_3^-$       | 0.04                                | 4.7                |
| $\text{Zn}^{2+}$ , $\text{SO}_4^{2-}$ | 2                                   | -3.0               |
| $\text{Ca}^{2+}$ , $\text{Cl}^-$      | 2                                   | 4.4                |
| $\text{Co}^{2+}$ , $\text{NO}_3^-$    | 4                                   | 4.7                |
| $\text{Mg}^{2+}$ , $\text{SO}_4^{2-}$ | 1                                   | -4.7               |
| $\text{K}^+$ , $\text{NO}_3^-$        | 0.2                                 | 0.36               |
| $\text{Cr}^{3+}$ , $\text{NO}_3^-$    | 0.2                                 | -4.9               |
| Met                                   | 10                                  | 4.5                |
| Ala                                   | 10                                  | -3.7               |
| Arg                                   | 10                                  | -5.5               |
| His                                   | 10                                  | 5.1                |
| Gly                                   | 10                                  | 3.0                |
| Asp                                   | 10                                  | -0.58              |
| Ile                                   | 10                                  | 5.4                |

|              |      |       |
|--------------|------|-------|
| Tyr          | 10   | 4.4   |
| Glu          | 10   | -3.4  |
| Val          | 10   | -3.8  |
| Phe          | 4    | -0.7  |
| Lys          | 8    | 1.8   |
| Leu          | 8    | 3.3   |
| BSA          | 1    | -4.9  |
| Pepsin       | 0.1  | 2.3   |
| Thrombin     | 0.1  | -0.29 |
| HRP          | 0.2  | 2.3   |
| Cellulase    | 0.02 | 2.5   |
| Lysozyme     | 1    | 4.3   |
| GOD          | 0.2  | 1.0   |
| HSA          | 0.02 | -2.1  |
| Glusulase    | 0.02 | -0.96 |
| Chymotrypsin | 0.16 | -1.8  |

---
